# Supplementary material for: Seasonality in Spatial Turnover of Bacterioplankton Along an Ecological Gradient in the East China Sea: Biogeographic Patterns, Processes and Drivers
Source: MDPI journal article supplement (doi:10.3390/microorganisms8101484), 2020-09-27
Supplement: s1 [file s1]

## Supplementary Figures and Tables

### Seasonality in spatial turnover of bacterioplankton along an ecological gradient in the East China Sea: biogeographic patterns, processes and drivers

Hanjing Hu<sup>1, 2, 3, †</sup>, Jiaying He<sup>2, 3, †</sup>, Huizhen Yan<sup>2</sup>, Dandi Hou<sup>2</sup>, Demin Zhang<sup>1, 2, 3</sup>, Lian Liu<sup>4, \*</sup>, Kai Wang<sup>1, 2, 3, \*</sup>

<sup>1</sup> State Key Laboratory for Managing Biotic and Chemical Threats to the Quality and Safety of Agro-products, Ningbo University, Ningbo 315211, China;  
hhj2141@163.com (H.H.); zhangdemin@nbu.edu.cn (D.Z.)

<sup>2</sup> School of Marine Sciences, Ningbo University, Ningbo 315211, China;  
joyhejiaying@outlook.com (J.H.); hzyan1995@163.com (H.Y.);  
houdandi@nbu.edu.cn (D.H.)

<sup>3</sup> Collaborative Innovation Center for Zhejiang Marine High-efficiency and Healthy Aquaculture, Ningbo, 315211, China

<sup>4</sup> Marine Environmental Monitoring Center of Ningbo, SOA, Ningbo 315012, China

<sup>†</sup> These authors contributed equally to this work.

<sup>\*</sup> correspondence: llan75@163.com (L.L.), wangkai@nbu.edu.cn (K.W.)

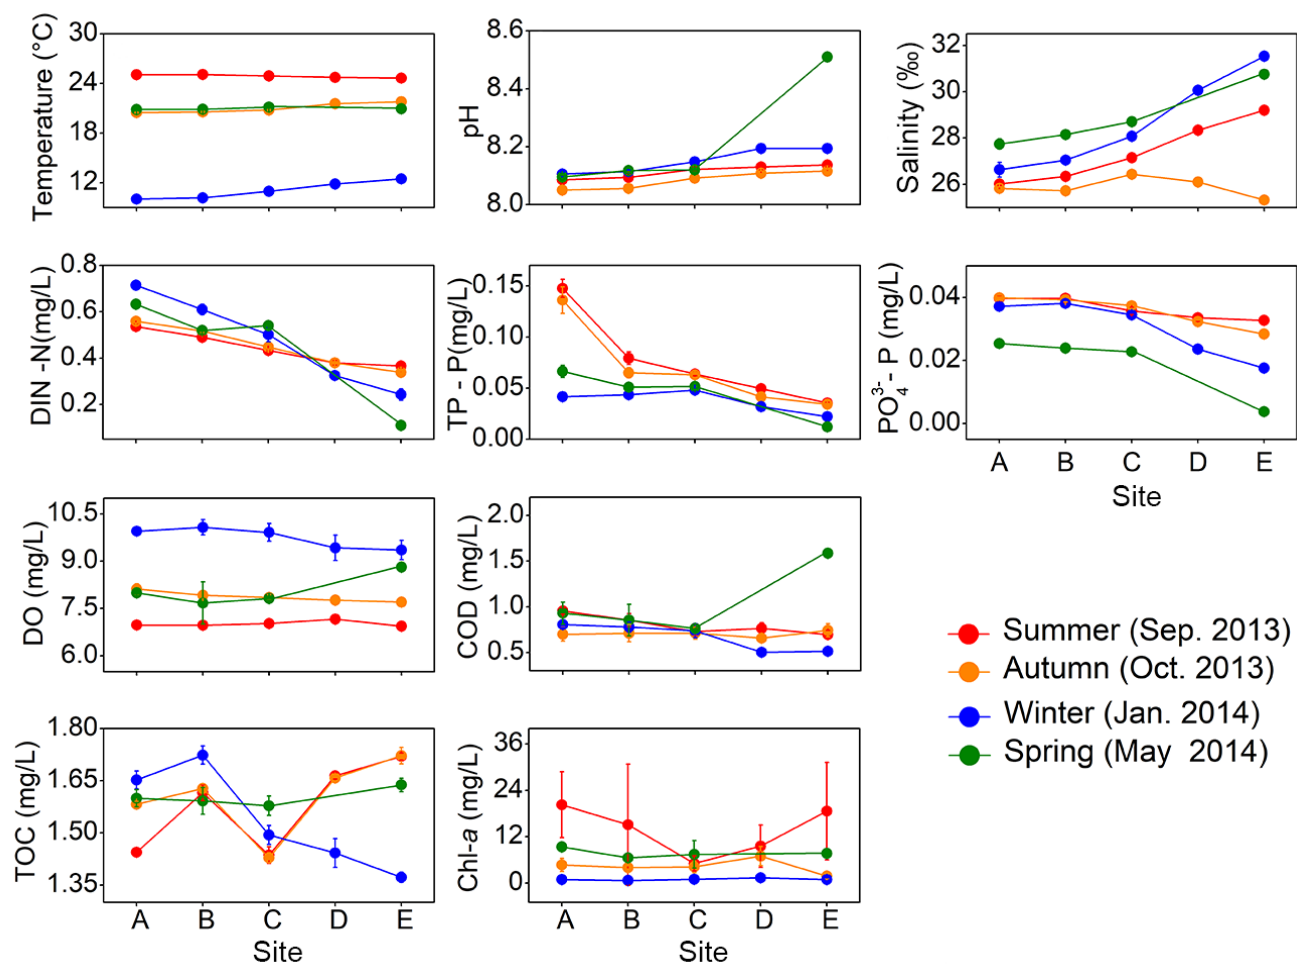

**Figure S1.** Spatiotemporal dynamics of water environmental parameters across five sites over seasons. Data represent mean  $\pm$  standard deviation (n = 5). DIN: dissolved inorganic nitrogen; TP: total phosphorus; COD: chemical oxygen demand; DO: dissolved oxygen; TOC: total organic carbon; Chl-*a*: chlorophyll-*a*. Site D was not sampled in spring.



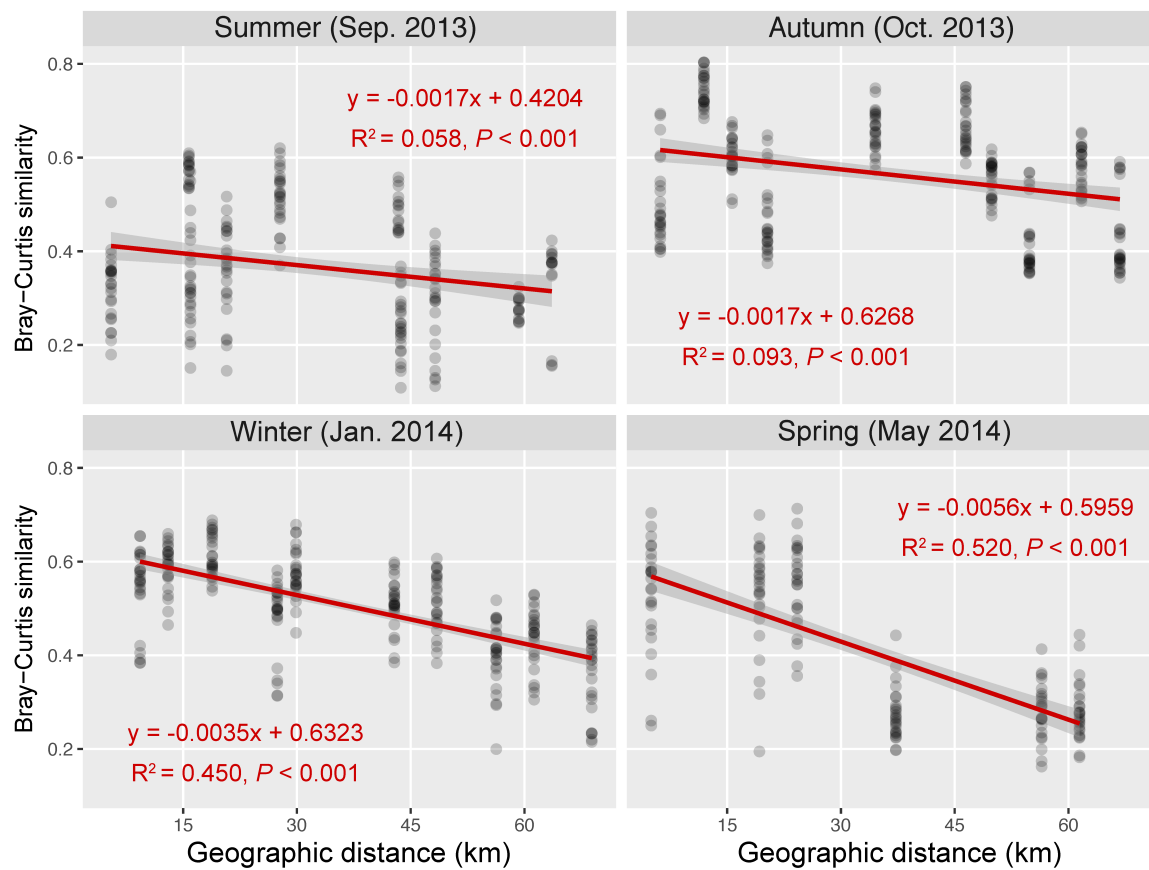

**Figure S3.** Significant correlations between Bray-Curtis similarity and geographic distance showing the distance-decay pattern in the similarity between bacterial communities. Solid lines present linear fit.

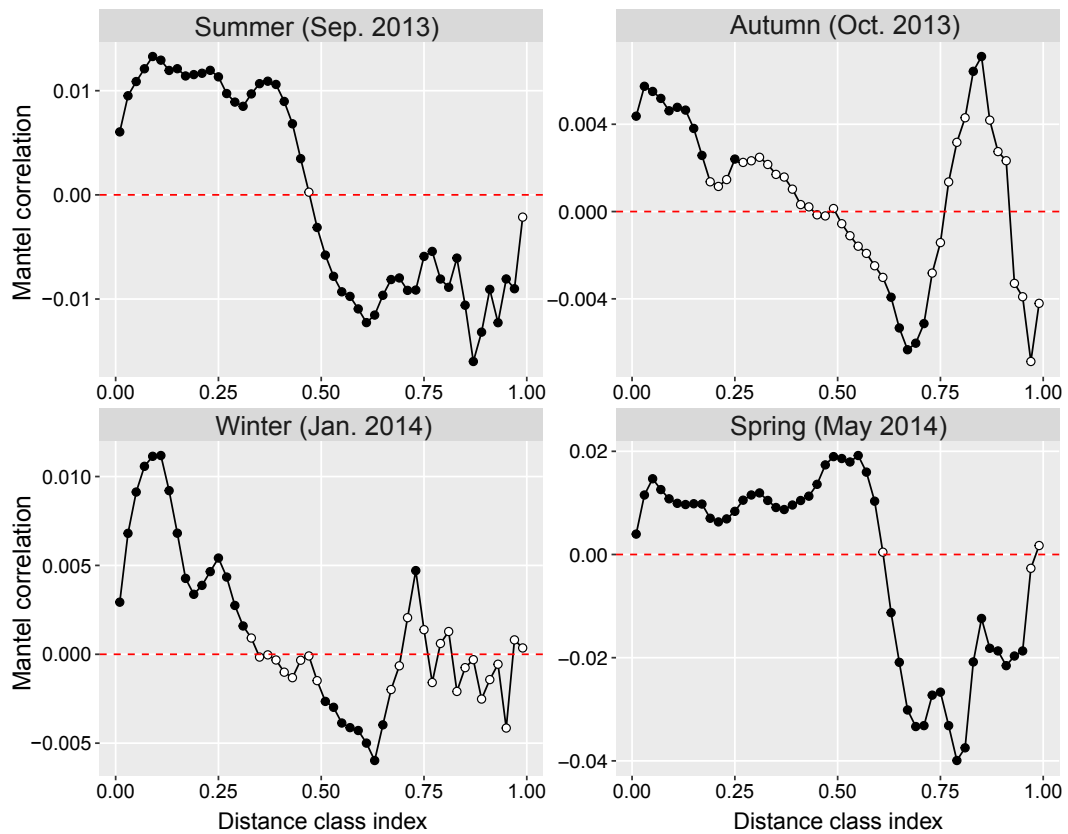

**Figure S4.** Mantel correlograms testing phylogenetic signal in ecological niches of bacterial OTUs across between-OTU phylogenetic distance classes in four seasons. Solid and open symbols present significant ( $P < 0.05$  after Holm correction, 999 permutations) and nonsignificant Pearson correlations of between-OTU niche differences with between-OTU phylogenetic distances, respectively, across phylogenetic distance classes.

**Table S1.** Two-way crossed analysis of similarity (ANOSIM) of bacterial community composition based on Bray-Curtis dissimilarity across seasons and sampling sites (999 permutations).

| <b>Factor</b>        | <b>R</b> | <b>P</b> |
|----------------------|----------|----------|
| <b><i>Season</i></b> |          |          |
| Global ANOSIM        | 0.978    | 0.001    |
| Summer vs. Autumn    | 0.908    | 0.001    |
| Summer vs. Winter    | 0.944    | 0.001    |
| Summer vs. Spring    | 0.995    | 0.001    |
| Autumn vs. Winter    | 1.000    | 0.001    |
| Summer vs. Spring    | 1.000    | 0.001    |
| Winter vs. Spring    | 1.000    | 0.001    |
| <b><i>Site</i></b>   |          |          |
| Global ANOSIM        | 0.627    | 0.001    |
| Site A vs. Site B    | 0.441    | 0.001    |
| Site A vs. Site C    | 0.447    | 0.001    |
| Site A vs. Site D    | 0.785    | 0.001    |
| Site A vs. Site E    | 0.830    | 0.001    |
| Site B vs. Site C    | 0.567    | 0.001    |
| Site B vs. Site D    | 0.964    | 0.001    |
| Site B vs. Site E    | 0.996    | 0.001    |
| Site C vs. Site D    | 0.479    | 0.001    |
| Site C vs. Site E    | 0.781    | 0.001    |
| Site D vs. Site E    | 0.317    | 0.002    |

**Table S2.** One-way analysis of similarity (ANOSIM) of bacteria community composition based on Bray-Curtis dissimilarity between sites in each season (999 permutations).

|         | Summer (Sep. 2013) |       |                  | Autumn (Oct. 2013) |       |                  | Winter (Jan. 2014) |       |                  | Spring (May 2014) |       |                  |
|---------|--------------------|-------|------------------|--------------------|-------|------------------|--------------------|-------|------------------|-------------------|-------|------------------|
|         | R                  | P     | $P_{\text{adj}}$ | R                  | P     | $P_{\text{adj}}$ | R                  | P     | $P_{\text{adj}}$ | R                 | P     | $P_{\text{adj}}$ |
| A vs. B | 0.588              | 0.016 | <b>0.023</b>     | 0.424              | 0.008 | <b>0.009</b>     | 0.548              | 0.008 | <b>0.011</b>     | 0.202             | 0.087 | 0.131            |
| A vs. C | 0.548              | 0.008 | <b>0.020</b>     | 0.520              | 0.008 | <b>0.009</b>     | 0.660              | 0.008 | <b>0.011</b>     | 0.050             | 0.341 | 0.341            |
| A vs. D | 0.680              | 0.008 | <b>0.020</b>     | 0.760              | 0.008 | <b>0.009</b>     | 0.916              | 0.008 | <b>0.011</b>     | —                 | —     | —                |
| A vs. E | 0.508              | 0.018 | <b>0.023</b>     | 0.740              | 0.008 | <b>0.009</b>     | 0.968              | 0.008 | <b>0.011</b>     | 0.992             | 0.008 | <b>0.016</b>     |
| B vs. C | 0.876              | 0.008 | <b>0.020</b>     | 0.884              | 0.008 | <b>0.009</b>     | 0.380              | 0.048 | 0.053            | 0.128             | 0.159 | 0.191            |
| B vs. D | 1.000              | 0.008 | <b>0.020</b>     | 1.000              | 0.008 | <b>0.009</b>     | 0.892              | 0.008 | <b>0.011</b>     | —                 | —     | —                |
| B vs. E | 1.000              | 0.018 | <b>0.023</b>     | 1.000              | 0.008 | <b>0.009</b>     | 1.000              | 0.008 | <b>0.011</b>     | 0.984             | 0.008 | <b>0.016</b>     |
| C vs. D | 0.442              | 0.024 | <b>0.027</b>     | 0.508              | 0.008 | <b>0.009</b>     | 0.488              | 0.016 | <b>0.020</b>     | —                 | —     | —                |
| C vs. E | 0.703              | 0.018 | <b>0.023</b>     | 0.532              | 0.008 | <b>0.009</b>     | 0.876              | 0.008 | <b>0.011</b>     | 0.988             | 0.008 | <b>0.016</b>     |
| D vs. E | 0.395              | 0.071 | 0.071            | 0.360              | 0.008 | <b>0.009</b>     | 0.224              | 0.103 | 0.103            | —                 | —     | —                |

$P_{\text{adj}}$ :  $P$  value adjusted by FDR.  $P_{\text{adj}}$  values in bold indicate significant difference between sites ( $P_{\text{adj}} < 0.05$ ).

**Table S3.** Distance-based multivariate linear model (DistLM) of compositional variation of bacterial community (based on Bray-Curtis dissimilarity) against environmental variables with 999 permutations. Marginal tests: each variable was analyzed individually (ignoring other variables); Sequential tests: forward selection of variables, where the proportion of variation explained by each variable added to the model was conditional on the variables previously included in the model.

| Season              | Marginal tests                |          |              |          | Conditional tests             |          |              |           |                      |
|---------------------|-------------------------------|----------|--------------|----------|-------------------------------|----------|--------------|-----------|----------------------|
|                     | Variable                      | pseudo-F | <i>P</i>     | Prop (%) | Variable                      | pseudo-F | <i>P</i>     | Prop. (%) | Cumulative Prop. (%) |
| All                 | Temp.                         | 22.59    | <b>0.001</b> | 19.89    | Temp.                         | 22.59    | <b>0.001</b> | 19.89     | 19.89                |
|                     | DO                            | 20.68    | <b>0.001</b> | 8.290    | PO <sub>4</sub> <sup>3-</sup> | 16.23    | <b>0.001</b> | 12.24     | 32.13                |
|                     | PO <sub>4</sub> <sup>3-</sup> | 12.59    | <b>0.001</b> | 10.39    | DIN                           | 15.47    | <b>0.001</b> | 10.05     | 42.18                |
|                     | Salinity                      | 10.54    | <b>0.001</b> | 18.52    | pH                            | 12.33    | <b>0.001</b> | 7.110     | 49.28                |
|                     | COD                           | 9.167    | <b>0.001</b> | 9.150    | Salinity                      | 13.98    | <b>0.001</b> | 7.020     | 56.31                |
|                     | pH                            | 8.223    | <b>0.001</b> | 1.950    | DTL                           | 5.120    | <b>0.001</b> | 2.460     | 58.76                |
|                     | Chl- <i>a</i>                 | 7.711    | <b>0.001</b> | 5.480    | Chl- <i>a</i>                 | 3.685    | <b>0.001</b> | 1.710     | 60.48                |
|                     | TP                            | 6.563    | <b>0.001</b> | 6.730    | TP                            | 3.471    | <b>0.001</b> | 1.570     | 62.04                |
|                     | DTL                           | 5.301    | <b>0.001</b> | 12.15    | TOC                           | 1.903    | <b>0.013</b> | 0.850     | 62.89                |
|                     | DIN                           | 5.280    | <b>0.001</b> | 7.810    | DO                            | 1.332    | 0.168        | 0.590     | 63.49                |
|                     | TOC                           | 1.805    | 0.057        | 5.500    | COD                           | 1.105    | 0.277        | 0.490     | 63.98                |
| Summer<br>Sep. 2013 | PO <sub>4</sub> <sup>3-</sup> | 7.945    | <b>0.001</b> | 27.45    | PO <sub>4</sub> <sup>3-</sup> | 7.945    | <b>0.001</b> | 27.45     | 27.45                |
|                     | Temp.                         | 7.632    | <b>0.001</b> | 26.65    | TP                            | 3.486    | <b>0.001</b> | 10.77     | 38.22                |
|                     | Salinity                      | 7.106    | <b>0.001</b> | 25.28    | DTL                           | 2.408    | <b>0.006</b> | 6.950     | 45.17                |
|                     | DIN                           | 7.092    | <b>0.001</b> | 25.24    | DIN                           | 2.389    | <b>0.013</b> | 6.420     | 51.59                |
|                     | DTL                           | 7.083    | <b>0.001</b> | 25.22    | pH                            | 2.135    | <b>0.023</b> | 5.400     | 56.99                |
|                     | pH                            | 6.877    | <b>0.001</b> | 24.67    | TOC                           | 1.687    | 0.078        | 4.100     | 61.09                |
|                     | TP                            | 4.580    | <b>0.001</b> | 17.91    | Temp.                         | 1.108    | 0.325        | 2.660     | 63.75                |
|                     | COD                           | 4.561    | <b>0.003</b> | 17.84    | DO                            | 1.064    | 0.374        | 2.580     | 66.33                |
|                     | TOC                           | 2.293    | <b>0.038</b> | 9.840    | Chl- <i>a</i>                 | 0.852    | 0.522        | 2.070     | 68.40                |
|                     | Chl- <i>a</i>                 | 2.062    | 0.063        | 8.940    | COD                           | 0.643    | 0.761        | 1.610     | 70.01                |
|                     | DO                            | 1.866    | 0.067        | 8.160    | Salinity                      | 0.583    | 0.791        | 1.510     | 71.52                |
| Autumn<br>Oct. 2013 | DIN                           | 10.16    | <b>0.001</b> | 30.64    | DIN                           | 10.16    | <b>0.001</b> | 30.64     | 30.64                |
|                     | pH                            | 9.357    | <b>0.001</b> | 28.92    | TP                            | 3.837    | <b>0.001</b> | 10.30     | 40.94                |
|                     | TP                            | 9.031    | <b>0.001</b> | 28.19    | DO                            | 2.849    | <b>0.002</b> | 7.060     | 48.00                |
|                     | DTL                           | 8.899    | <b>0.001</b> | 27.90    | Salinity                      | 2.173    | <b>0.004</b> | 5.100     | 53.10                |
|                     | Temp.                         | 8.605    | <b>0.001</b> | 27.23    | TOC                           | 1.169    | 0.245        | 2.720     | 55.82                |
|                     | DO                            | 8.339    | <b>0.001</b> | 26.61    | COD                           | 1.020    | 0.400        | 2.370     | 58.19                |
|                     | PO <sub>4</sub> <sup>3-</sup> | 7.699    | <b>0.001</b> | 25.08    | DTL                           | 0.994    | 0.469        | 2.320     | 60.51                |
|                     | TOC                           | 1.674    | 0.134        | 6.790    | PO <sub>4</sub> <sup>3-</sup> | 0.950    | 0.478        | 2.210     | 62.72                |
|                     | Salinity                      | 0.932    | 0.455        | 3.900    | pH                            | 0.822    | 0.620        | 1.940     | 64.66                |
|                     | COD                           | 0.655    | 0.739        | 2.770    | Temp.                         | 0.717    | 0.740        | 1.720     | 66.38                |
|                     | Chl- <i>a</i>                 | 0.584    | 0.844        | 2.480    | Chl- <i>a</i>                 | 0.665    | 0.825        | 1.640     | 68.02                |
| Winter<br>Jan. 2014 | DIN                           | 11.12    | <b>0.001</b> | 32.58    | DIN                           | 11.12    | <b>0.001</b> | 32.58     | 32.58                |
|                     | DTL                           | 10.98    | <b>0.001</b> | 32.31    | TP                            | 3.057    | <b>0.001</b> | 8.230     | 40.81                |
|                     | pH                            | 10.86    | <b>0.001</b> | 32.06    | DTL                           | 2.025    | <b>0.023</b> | 4.970     | 45.78                |
|                     | Temp.                         | 10.77    | <b>0.001</b> | 31.90    | Salinity                      | 1.710    | <b>0.043</b> | 4.040     | 49.82                |
|                     | Salinity                      | 10.64    | <b>0.001</b> | 31.64    | pH                            | 1.367    | 0.136        | 3.620     | 53.44                |
|                     | PO <sub>4</sub> <sup>3-</sup> | 9.703    | <b>0.001</b> | 29.67    | COD                           | 1.292    | 0.181        | 3.370     | 56.81                |
|                     | TOC                           | 8.420    | <b>0.001</b> | 26.80    | PO <sub>4</sub> <sup>3-</sup> | 1.172    | 0.254        | 3.030     | 59.84                |
|                     | COD                           | 8.138    | <b>0.001</b> | 26.13    | DO                            | 1.095    | 0.342        | 2.570     | 62.41                |
|                     | TP                            | 6.787    | <b>0.001</b> | 22.79    | TOC                           | 1.026    | 0.404        | 2.410     | 64.82                |
|                     | DO                            | 4.831    | <b>0.002</b> | 17.36    | Chl- <i>a</i>                 | 0.859    | 0.618        | 2.030     | 66.85                |
|                     | Chl- <i>a</i>                 | 1.853    | 0.061        | 7.450    | Temp.                         | 0.767    | 0.714        | 1.850     | 68.70                |
| Spring<br>May 2014  | pH                            | 13.95    | <b>0.001</b> | 43.67    | pH                            | 13.95    | <b>0.001</b> | 43.67     | 43.67                |
|                     | PO <sub>4</sub> <sup>3-</sup> | 13.41    | <b>0.001</b> | 42.69    | Chl- <i>a</i>                 | 2.954    | <b>0.006</b> | 8.340     | 52.01                |



|  |               |       |              |       |                               |       |       |       |       |
|--|---------------|-------|--------------|-------|-------------------------------|-------|-------|-------|-------|
|  | DIN           | 12.96 | <b>0.001</b> | 41.85 | DTL                           | 1.914 | 0.053 | 4.920 | 56.93 |
|  | Salinity      | 11.75 | <b>0.001</b> | 39.49 | PO <sub>4</sub> <sup>3-</sup> | 1.677 | 0.087 | 4.550 | 61.48 |
|  | COD           | 11.67 | <b>0.001</b> | 39.34 | DIN                           | 1.666 | 0.096 | 3.940 | 65.42 |
|  | TP            | 11.48 | <b>0.001</b> | 38.94 | COD                           | 1.541 | 0.142 | 3.820 | 69.24 |
|  | DTL           | 11.29 | <b>0.001</b> | 38.55 | Temp.                         | 1.322 | 0.227 | 3.030 | 72.27 |
|  | DO            | 7.423 | <b>0.001</b> | 29.20 | TP                            | 1.058 | 0.355 | 2.490 | 74.76 |
|  | TOC           | 3.841 | <b>0.005</b> | 17.58 | DO                            | 0.967 | 0.500 | 2.230 | 76.99 |
|  | Chl- <i>a</i> | 1.564 | 0.165        | 8.000 | Salinity                      | 0.689 | 0.703 | 1.640 | 78.63 |
|  | Temp.         | 0.689 | 0.618        | 3.690 | TOC                           | 0.452 | 0.889 | 1.140 | 79.77 |

DTL, distance to land; DIN, dissolved inorganic nitrogen; TP, total phosphorus; Temp., water temperature; COD, chemical oxygen demand; DO, dissolved oxygen; TOC, total organic carbon. Chl-*a*, chlorophyll-*a*. *P* values in bold indicate significant correlations ( $P < 0.05$ ).

**Table S4.** Spearman's correlation coefficients between geo-environmental factors.

| Season                | Variables                     | DTL              | Temp.            | pH               | Salinity         | DO              | COD             | TOC              | DIN             | TP              | PO <sub>4</sub> <sup>3-</sup> |
|-----------------------|-------------------------------|------------------|------------------|------------------|------------------|-----------------|-----------------|------------------|-----------------|-----------------|-------------------------------|
| Summer<br>(Sep. 2013) | Temp.                         | <b>-0.904***</b> |                  |                  |                  |                 |                 |                  |                 |                 |                               |
|                       | pH                            | <b>0.877***</b>  | <b>-0.851***</b> |                  |                  |                 |                 |                  |                 |                 |                               |
|                       | Salinity                      | <b>0.979***</b>  | <b>-0.885***</b> | <b>0.867***</b>  |                  |                 |                 |                  |                 |                 |                               |
|                       | DO                            | 0.302            | <b>-0.417*</b>   | <b>0.292*</b>    | 0.341            |                 |                 |                  |                 |                 |                               |
|                       | COD                           | <b>-0.777***</b> | <b>0.693***</b>  | <b>-0.822***</b> | <b>-0.765***</b> | -0.134          |                 |                  |                 |                 |                               |
|                       | TOC                           | <b>0.693***</b>  | <b>-0.599**</b>  | <b>0.469*</b>    | <b>0.685***</b>  | 0.255           | -0.332          |                  |                 |                 |                               |
|                       | DIN                           | <b>-0.971***</b> | <b>0.913***</b>  | <b>-0.828***</b> | <b>-0.958***</b> | -0.380          | <b>0.759***</b> | <b>-0.699***</b> |                 |                 |                               |
|                       | TP                            | <b>-0.979***</b> | <b>0.874***</b>  | <b>-0.873***</b> | <b>-0.968***</b> | -0.283          | <b>0.805***</b> | <b>-0.668***</b> | <b>0.958***</b> |                 |                               |
|                       | PO <sub>4</sub> <sup>3-</sup> | <b>-0.882***</b> | <b>0.867***</b>  | <b>-0.842***</b> | <b>-0.878***</b> | -0.270          | <b>0.762***</b> | <b>-0.510*</b>   | <b>0.872***</b> | <b>0.902***</b> |                               |
|                       | Chl- <i>a</i>                 | -0.130           | 0.187            | -0.245           | -0.152           | -0.254          | 0.259           | 0.136            | 0.184           | 0.121           | 0.141                         |
| Autumn<br>(Oct. 2013) | Temp.                         | <b>0.976***</b>  |                  |                  |                  |                 |                 |                  |                 |                 |                               |
|                       | pH                            | <b>0.937***</b>  | <b>0.923***</b>  |                  |                  |                 |                 |                  |                 |                 |                               |
|                       | Salinity                      | -0.196           | -0.194           | -0.110           |                  |                 |                 |                  |                 |                 |                               |
|                       | DO                            | <b>-0.841***</b> | <b>-0.805***</b> | <b>-0.785***</b> | 0.119            |                 |                 |                  |                 |                 |                               |
|                       | COD                           | 0.081            | 0.016            | -0.039           | -0.208           | -0.031          |                 |                  |                 |                 |                               |
|                       | TOC                           | <b>0.687***</b>  | <b>0.670***</b>  | <b>0.583**</b>   | <b>-0.671***</b> | <b>-0.515**</b> | 0.027           |                  |                 |                 |                               |
|                       | DIN                           | <b>-0.981***</b> | <b>-0.964***</b> | <b>-0.922***</b> | 0.199            | <b>0.889***</b> | -0.004          | <b>-0.663***</b> |                 |                 |                               |
|                       | TP                            | <b>-0.942***</b> | <b>-0.913***</b> | <b>-0.861***</b> | 0.320            | <b>0.763***</b> | 0.067           | <b>-0.746***</b> | <b>0.931***</b> |                 |                               |
|                       | PO <sub>4</sub> <sup>3-</sup> | <b>-0.934***</b> | <b>-0.902***</b> | <b>-0.888***</b> | 0.165            | <b>0.732***</b> | -0.040          | <b>-0.671***</b> | <b>0.888***</b> | <b>0.863***</b> |                               |
|                       | Chl- <i>a</i>                 | -0.345           | -0.339           | -0.203           | 0.508            | 0.191           | <b>-0.474*</b>  | -0.365           | 0.323           | 0.293           | 0.294                         |
| Winter<br>(Jan. 2014) | Temp.                         | <b>0.984***</b>  |                  |                  |                  |                 |                 |                  |                 |                 |                               |
|                       | pH                            | <b>0.931***</b>  | <b>0.919***</b>  |                  |                  |                 |                 |                  |                 |                 |                               |
|                       | Salinity                      | <b>0.969***</b>  | <b>0.948***</b>  | <b>0.928***</b>  |                  |                 |                 |                  |                 |                 |                               |
|                       | DO                            | <b>-0.639**</b>  | <b>-0.613**</b>  | <b>-0.607**</b>  | <b>-0.630**</b>  |                 |                 |                  |                 |                 |                               |
|                       | COD                           | <b>-0.837***</b> | <b>-0.811***</b> | <b>-0.820***</b> | <b>-0.831***</b> | <b>0.647***</b> |                 |                  |                 |                 |                               |
|                       | TOC                           | <b>-0.868***</b> | <b>-0.864***</b> | <b>-0.843***</b> | <b>-0.900***</b> | <b>0.657***</b> | <b>0.731***</b> |                  |                 |                 |                               |
|                       | DIN                           | <b>-0.981***</b> | <b>-0.967***</b> | <b>-0.931***</b> | <b>-0.969***</b> | <b>0.671***</b> | <b>0.840***</b> | <b>0.868***</b>  |                 |                 |                               |
|                       | TP                            | <b>-0.600**</b>  | <b>-0.597**</b>  | <b>-0.557**</b>  | <b>-0.589**</b>  | <b>0.645***</b> | <b>0.648***</b> | <b>0.620***</b>  | <b>0.602**</b>  |                 |                               |
|                       | PO <sub>4</sub> <sup>3-</sup> | <b>-0.907***</b> | <b>-0.897***</b> | <b>-0.877***</b> | <b>-0.894***</b> | <b>0.657***</b> | <b>0.845***</b> | <b>0.943***</b>  | <b>0.907***</b> | <b>0.654***</b> |                               |
|                       | Chl- <i>a</i>                 | 0.258            | 0.245            | 0.341            | 0.237            | -0.335          | -0.337          | -0.363           | -0.254          | -0.187          | -0.369                        |
| Spring<br>(May 2014)  | Temp.                         | <b>0.733***</b>  |                  |                  |                  |                 |                 |                  |                 |                 |                               |
|                       | pH                            | <b>0.898***</b>  | <b>0.558*</b>    |                  |                  |                 |                 |                  |                 |                 |                               |
|                       | Salinity                      | <b>0.964***</b>  | <b>0.710***</b>  | <b>0.841***</b>  |                  |                 |                 |                  |                 |                 |                               |
|                       | DO                            | 0.272            | -0.231           | 0.312            | 0.227            |                 |                 |                  |                 |                 |                               |
|                       | COD                           | 0.365            | -0.151           | 0.336            | 0.417            | <b>0.628**</b>  |                 |                  |                 |                 |                               |
|                       | TOC                           | 0.359            | -0.117           | 0.398            | 0.410            | 0.431           | <b>0.573**</b>  |                  |                 |                 |                               |
|                       | DIN                           | <b>-0.776***</b> | -0.271           | <b>-0.792***</b> | <b>-0.748***</b> | -0.399          | <b>-0.484*</b>  | <b>-0.468*</b>   |                 |                 |                               |
|                       | TP                            | <b>-0.877***</b> | <b>-0.503*</b>   | <b>-0.900***</b> | <b>-0.847***</b> | -0.263          | -0.423          | <b>-0.500*</b>   | <b>0.879***</b> |                 |                               |
|                       | PO <sub>4</sub> <sup>3-</sup> | <b>-0.941***</b> | <b>-0.734***</b> | <b>-0.867***</b> | <b>-0.917***</b> | -0.242          | -0.336          | -0.362           | <b>0.711***</b> | <b>0.836***</b> |                               |
|                       | Chl- <i>a</i>                 | -0.319           | -0.287           | <b>-0.491*</b>   | -0.274           | 0.293           | 0.270           | 0.134            | 0.408           | <b>0.521*</b>   | 0.375                         |

DTL, distance to land; DIN, dissolved inorganic nitrogen; TP, total phosphorus; Temp., water temperature; COD, chemical oxygen demand; DO, dissolved oxygen; TOC, total organic carbon. Chl-*a*, chlorophyll-*a*. Bold values indicate significant correlations (\* $P < 0.05$ ; \*\* $P < 0.01$ ; \*\*\* $P < 0.001$ ).
