# Supplementary material for: Seasonality in Spatial Turnover of Bacterioplankton Along an Ecological Gradient in the East China Sea: Biogeographic Patterns, Processes and Drivers
Source: MDPI journal article supplement (doi:10.3390/microorganisms8101484), 2020-09-27
Supplement: s1 [file s1]

**Dataset S2** Similarity percentage analysis (SIMPER) showing key driver OTUs responsible for spatial turnover of bacterioplankton in each season.

|                    | OTU ID | Contribution (%) | Cumulative (%) | Taxonomy                                                                                                                                                                                                     |
|--------------------|--------|------------------|----------------|--------------------------------------------------------------------------------------------------------------------------------------------------------------------------------------------------------------|
| Summer (Sep. 2013) | OTU 1  | 4.368            | 4.368          | D_1__Proteobacteria; D_2__Gammaproteobacteria; D_3__Alteromonadales; D_4__Pseudoalteromonadaceae; D_5__ <i>Pseudoalteromonas</i>                                                                             |
|                    | OTU 2  | 3.513            | 7.881          | D_1__Proteobacteria; D_2__Gammaproteobacteria; D_3__Alteromonadales; D_4__Alteromonadaceae; D_5__ <i>Alteromonas</i> ; D_6__uncultured bacterium                                                             |
|                    | OTU 3  | 2.350            | 10.23          | D_1__Proteobacteria; D_2__Alphaproteobacteria; D_3__Rhodobacterales; D_4__Rhodobacteraceae; D_5__uncultured; D_6__uncultured bacterium                                                                       |
|                    | OTU 4  | 2.335            | 12.57          | D_1__Proteobacteria; D_2__Alphaproteobacteria; D_3__Rhodobacterales; D_4__Rhodobacteraceae; D_5__uncultured                                                                                                  |
|                    | OTU 5  | 2.138            | 14.70          | D_1__Proteobacteria; D_2__Gammaproteobacteria; D_3__Oceanospirillales; D_4__Oceanospirillaceae; D_5__ <i>Neptuniibacter</i>                                                                                  |
|                    | OTU 6  | 1.820            | 16.52          | D_1__Actinobacteria; D_2__Acidimicrobiia; D_3__Acidimicrobiales; D_4__OM1 clade; D_5__ <i>Candidatus</i> Actinomarina; D_6__uncultured bacterium                                                             |
|                    | OTU 7  | 1.789            | 18.31          | D_1__Proteobacteria; D_2__Gammaproteobacteria; D_3__Oceanospirillales; D_4__Oceanospirillaceae; D_5__ <i>Oceanospirillum</i> ; Ambiguous_taxa                                                                |
|                    | OTU 8  | 1.573            | 19.89          | D_1__Proteobacteria; D_2__Alphaproteobacteria; D_3__Rhodobacterales; D_4__Rhodobacteraceae; D_5__ <i>Sulfitobacter</i>                                                                                       |
|                    | OTU 9  | 1.495            | 21.38          | D_1__Bacteroidetes; D_2__Flavobacteriia; D_3__Flavobacteriales; D_4__Cryomorphaceae; D_5__ <i>Fluviicola</i> ; D_6__uncultured bacterium                                                                     |
|                    | OTU 10 | 1.450            | 22.83          | D_1__Proteobacteria; D_2__Gammaproteobacteria; D_3__Alteromonadales; D_4__Pseudoalteromonadaceae; Ambiguous_taxa                                                                                             |
|                    | OTU 11 | 1.450            | 24.28          | D_1__Proteobacteria; D_2__Gammaproteobacteria; D_3__Alteromonadales; D_4__Pseudoalteromonadaceae; D_5__ <i>Pseudoalteromonas</i>                                                                             |
|                    | OTU 12 | 1.442            | 25.72          | D_1__Proteobacteria; D_2__Gammaproteobacteria; D_3__Oceanospirillales; D_4__SAR86 clade; Ambiguous_taxa; Ambiguous_taxa                                                                                      |
|                    | OTU 13 | 1.439            | 27.16          | D_1__Proteobacteria; D_2__Gammaproteobacteria; D_3__Oceanospirillales; D_4__Oceanospirillaceae; D_5__ <i>Neptuniibacter</i>                                                                                  |
|                    | OTU 14 | 1.311            | 28.47          | D_1__Proteobacteria; D_2__Gammaproteobacteria; D_3__Oceanospirillales; D_4__Oceanospirillaceae; D_5__ <i>Neptuniibacter</i>                                                                                  |
|                    | OTU 15 | 1.268            | 29.74          | D_1__Proteobacteria; D_2__Gammaproteobacteria; D_3__Alteromonadales; D_4__Alteromonadaceae; D_5__ <i>Marinobacter</i> ; D_6__ <i>Marinobacter hydrocarbonoclasticus</i>                                      |
|                    | OTU 16 | 1.253            | 30.99          | D_1__Proteobacteria; D_2__Gammaproteobacteria; D_3__Oceanospirillales; D_4__Oceanospirillaceae; D_5__ <i>Oceanospirillum</i> ; Ambiguous_taxa                                                                |
|                    | OTU 17 | 1.106            | 32.10          | D_1__Proteobacteria; D_2__Gammaproteobacteria; D_3__Alteromonadales; D_4__Alteromonadaceae; D_5__ <i>Marinobacter</i> ; D_6__uncultured <i>Marinobacter</i> sp.                                              |
|                    | OTU 18 | 0.952            | 33.05          | D_1__Proteobacteria; D_2__Gammaproteobacteria; D_3__Alteromonadales; D_4__Pseudoalteromonadaceae; D_5__ <i>Pseudoalteromonas</i>                                                                             |
|                    | OTU 19 | 0.724            | 33.78          | D_1__Proteobacteria; D_2__Alphaproteobacteria; D_3__Rhodospirillales; D_4__Rhodospirillaceae; D_5__AEGEAN-169 marine group; D_6__uncultured bacterium                                                        |
|                    | OTU 20 | 0.704            | 34.48          | D_1__Bacteroidetes; D_2__Flavobacteriia; D_3__Flavobacteriales; D_4__Flavobacteriaceae; D_5__ <i>Salagentibacter</i> ; Ambiguous_taxa                                                                        |
| Autumn (Oct. 2013) | OTU 6  | 4.458            | 4.458          | D_1__Actinobacteria; D_2__Acidimicrobiia; D_3__Acidimicrobiales; D_4__OM1 clade; D_5__ <i>Candidatus</i> Actinomarina; D_6__uncultured bacterium                                                             |
|                    | OTU 21 | 3.084            | 7.542          | D_1__Proteobacteria; D_2__Betaproteobacteria; D_3__Methylophilales; D_4__Methylophilaceae; D_5__OM43 clade; D_6__uncultured bacterium                                                                        |
|                    | OTU 22 | 2.447            | 9.989          | D_1__Proteobacteria; D_2__Alphaproteobacteria; D_3__Rhodobacterales; D_4__Rhodobacteraceae                                                                                                                   |
|                    | OTU 23 | 1.462            | 11.45          | D_1__Proteobacteria; D_2__Betaproteobacteria; D_3__Methylophilales; D_4__Methylophilaceae; D_5__OM43 clade; D_6__uncultured bacterium                                                                        |
|                    | OTU 19 | 1.411            | 12.86          | D_1__Proteobacteria; D_2__Alphaproteobacteria; D_3__Rhodospirillales; D_4__Rhodospirillaceae; D_5__AEGEAN-169 marine group; D_6__uncultured bacterium                                                        |
|                    | OTU 24 | 1.223            | 14.09          | D_1__Proteobacteria; D_2__Gammaproteobacteria; D_3__Oceanospirillales; D_4__SAR86 clade; Ambiguous_taxa; Ambiguous_taxa                                                                                      |
|                    | OTU 12 | 0.950            | 15.04          | D_1__Proteobacteria; D_2__Gammaproteobacteria; D_3__Oceanospirillales; D_4__SAR86 clade; Ambiguous_taxa; Ambiguous_taxa                                                                                      |
|                    | OTU 25 | 0.883            | 15.92          | D_1__Bacteroidetes; D_2__Flavobacteriia; D_3__Flavobacteriales; D_4__Flavobacteriaceae; D_5__NS5 marine group; D_6__uncultured bacterium                                                                     |
|                    | OTU 26 | 0.835            | 16.75          | D_1__Proteobacteria; D_2__Gammaproteobacteria; D_3__Oceanospirillales; D_4__SS1-B-06-26                                                                                                                      |
|                    | OTU 27 | 0.787            | 17.54          | D_1__Proteobacteria; D_2__Gammaproteobacteria; D_3__Oceanospirillales; D_4__Alcanivoracaceae; D_5__ <i>Alcanivorax</i> ; Ambiguous_taxa                                                                      |
|                    | OTU 28 | 0.777            | 18.32          | D_1__Actinobacteria; D_2__Acidimicrobiia; D_3__Acidimicrobiales; D_4__OM1 clade; D_5__ <i>Candidatus</i> Actinomarina; D_6__uncultured bacterium                                                             |
|                    | OTU 29 | 0.763            | 19.08          | D_1__Actinobacteria; D_2__Acidimicrobiia; D_3__Acidimicrobiales; D_4__OM1 clade; D_5__ <i>Candidatus</i> Actinomarina; D_6__uncultured bacterium                                                             |
|                    | OTU 30 | 0.739            | 19.82          | D_1__Bacteroidetes; D_2__Flavobacteriia; D_3__Flavobacteriales; D_4__Flavobacteriaceae; D_5__NS5 marine group; D_6__uncultured bacterium                                                                     |
|                    | OTU 31 | 0.668            | 20.49          | D_1__Chloroflexi; D_2__SAR202 clade; Ambiguous_taxa; Ambiguous_taxa; Ambiguous_taxa; Ambiguous_taxa                                                                                                          |
|                    | OTU 32 | 0.567            | 21.05          | D_1__Proteobacteria; D_2__Gammaproteobacteria; D_3__Oceanospirillales; D_4__Halomonadaceae; D_5__ <i>Salinicola</i>                                                                                          |
|                    | OTU 33 | 0.555            | 21.61          | D_1__Proteobacteria; D_2__Betaproteobacteria; D_3__Hydrogenophilales; D_4__Hydrogenophilaceae; D_5__uncultured                                                                                               |
|                    | OTU 2  | 0.543            | 22.15          | D_1__Proteobacteria; D_2__Gammaproteobacteria; D_3__Alteromonadales; D_4__Alteromonadaceae; D_5__ <i>Alteromonas</i> ; D_6__uncultured bacterium                                                             |
|                    | OTU 34 | 0.538            | 22.69          | D_1__Marinimicrobia (SAR406 clade); D_2__uncultured marine bacterium; D_3__uncultured marine bacterium; D_4__uncultured marine bacterium; D_5__uncultured marine bacterium; D_6__uncultured marine bacterium |
|                    | OTU 35 | 0.537            | 23.23          | D_1__Proteobacteria; D_2__Gammaproteobacteria; D_3__E01-9C-26 marine group; Ambiguous_taxa; Ambiguous_taxa; Ambiguous_taxa                                                                                   |

|                    |        |       |       |                                                                                                                                                       |
|--------------------|--------|-------|-------|-------------------------------------------------------------------------------------------------------------------------------------------------------|
|                    | OTU 36 | 0.531 | 23.76 | D_1__Nitrospinae; D_2__Nitrospina; D_3__Nitrospinales; D_4__Nitrospinaceae; D_5__uncultured                                                           |
| Winter (Jan. 2014) | OTU 23 | 5.031 | 5.031 | D_1__Proteobacteria; D_2__Betaproteobacteria; D_3__Methylophilales; D_4__Methylophilaceae; D_5__OM43 clade; D_6__uncultured bacterium                 |
|                    | OTU 37 | 2.461 | 7.491 | D_1__Proteobacteria; D_2__Gammaproteobacteria; D_3__Cellvibrionales; D_4__Cellvibrionaceae; D_5__ <i>Gilvimirinus</i> ; Ambiguous_taxa                |
|                    | OTU 38 | 2.187 | 9.678 | D_1__Proteobacteria; D_2__Gammaproteobacteria; D_3__Alteromonadales; D_4__Alteromonadaceae; D_5__ <i>Salinimonas</i> ; Ambiguous_taxa                 |
|                    | OTU 6  | 1.817 | 11.50 | D_1__Actinobacteria; D_2__Acidimicrobiia; D_3__Acidimicrobiales; D_4__OM1 clade; D_5__ <i>Candidatus</i> Actinomarina; D_6__uncultured bacterium      |
|                    | OTU 39 | 1.496 | 12.99 | D_1__Proteobacteria; D_2__Alphaproteobacteria; D_3__SAR11 clade; D_4__Surface 1; Ambiguous_taxa; Ambiguous_taxa                                       |
|                    | OTU 40 | 1.408 | 14.40 | D_1__Proteobacteria; D_2__Alphaproteobacteria; D_3__SAR11 clade; D_4__Surface 1; D_5__uncultured bacterium; D_6__uncultured bacterium                 |
|                    | OTU 21 | 1.237 | 15.64 | D_1__Proteobacteria; D_2__Betaproteobacteria; D_3__Methylophilales; D_4__Methylophilaceae; D_5__OM43 clade; D_6__uncultured bacterium                 |
|                    | OTU 41 | 1.173 | 16.81 | D_1__Proteobacteria; D_2__Alphaproteobacteria; D_3__SAR11 clade; D_4__Surface 1; D_5__uncultured marine bacterium; D_6__uncultured marine bacterium   |
|                    | OTU 42 | 0.936 | 17.75 | D_1__Bacteroidetes; D_2__Flavobacteriia; D_3__Flavobacteriales; D_4__Flavobacteriaceae; D_5__ <i>Salegentibacter</i>                                  |
|                    | OTU 20 | 0.882 | 18.63 | D_1__Bacteroidetes; D_2__Flavobacteriia; D_3__Flavobacteriales; D_4__Flavobacteriaceae; D_5__ <i>Salegentibacter</i> ; Ambiguous_taxa                 |
|                    | OTU 43 | 0.790 | 19.42 | D_1__Proteobacteria; D_2__Alphaproteobacteria; D_3__SAR11 clade; D_4__Surface 1; D_5__uncultured bacterium; D_6__uncultured bacterium                 |
|                    | OTU 22 | 0.769 | 20.19 | D_1__Proteobacteria; D_2__Alphaproteobacteria; D_3__Rhodobacterales; D_4__Rhodobacteraceae                                                            |
|                    | OTU 44 | 0.623 | 20.81 | D_1__Proteobacteria; D_2__Alphaproteobacteria; D_3__Rhodobacterales; D_4__Rhodobacteraceae; Ambiguous_taxa; Ambiguous_taxa                            |
|                    | OTU 45 | 0.578 | 21.39 | D_1__Proteobacteria; D_2__Alphaproteobacteria; D_3__SAR11 clade; D_4__Surface 1                                                                       |
|                    | OTU 19 | 0.560 | 21.95 | D_1__Proteobacteria; D_2__Alphaproteobacteria; D_3__Rhodospirillales; D_4__Rhodospirillaceae; D_5__AEGEAN-169 marine group; D_6__uncultured bacterium |
|                    | OTU 46 | 0.547 | 22.49 | D_1__Proteobacteria; D_2__AEGEAN-245; Ambiguous_taxa; Ambiguous_taxa; Ambiguous_taxa; Ambiguous_taxa                                                  |
|                    | OTU 47 | 0.540 | 23.03 | D_1__Proteobacteria; D_2__Gammaproteobacteria; D_3__Oceanospirillales; D_4__Halomonadaceae; D_5__ <i>Halomonas</i> ; D_6__uncultured Halomonas sp.    |
|                    | OTU 48 | 0.495 | 23.53 | D_1__Proteobacteria; D_2__Alphaproteobacteria; D_3__SAR11 clade; D_4__Surface 1                                                                       |
|                    | OTU 29 | 0.464 | 23.99 | D_1__Actinobacteria; D_2__Acidimicrobiia; D_3__Acidimicrobiales; D_4__OM1 clade; D_5__ <i>Candidatus</i> Actinomarina; D_6__uncultured bacterium      |
|                    | OTU 49 | 0.457 | 24.45 | D_1__Cyanobacteria; D_2__Cyanobacteria; D_3__SubsectionI; D_4__FamilyI; D_5__ <i>Synechococcus</i> ; D_6__uncultured bacterium                        |
| Spring (May 2014)  | OTU 50 | 8.356 | 8.356 | D_1__Actinobacteria; D_2__Acidimicrobiia; D_3__Acidimicrobiales; D_4__OM1 clade; D_5__ <i>Candidatus</i> Actinomarina                                 |
|                    | OTU 51 | 3.429 | 11.79 | D_1__Actinobacteria; D_2__Acidimicrobiia; D_3__Acidimicrobiales; D_4__OM1 clade; D_5__ <i>Candidatus</i> Actinomarina; Ambiguous_taxa                 |
|                    | OTU 40 | 3.356 | 15.14 | D_1__Proteobacteria; D_2__Alphaproteobacteria; D_3__SAR11 clade; D_4__Surface 1; D_5__uncultured bacterium; D_6__uncultured bacterium                 |
|                    | OTU 6  | 2.776 | 17.92 | D_1__Actinobacteria; D_2__Acidimicrobiia; D_3__Acidimicrobiales; D_4__OM1 clade; D_5__ <i>Candidatus</i> Actinomarina; D_6__uncultured bacterium      |
|                    | OTU 52 | 2.555 | 20.47 | D_1__Proteobacteria; D_2__Gammaproteobacteria; D_3__Cellvibrionales; D_4__Haliaceae; D_5__OM60(NOR5) clade                                            |
|                    | OTU 53 | 2.134 | 22.61 | D_1__Proteobacteria; D_2__Alphaproteobacteria; D_3__Rhizobiales; D_4__Rhodobiaceae; D_5__ <i>Rhodobium</i>                                            |
|                    | OTU 12 | 1.795 | 24.40 | D_1__Proteobacteria; D_2__Gammaproteobacteria; D_3__Oceanospirillales; D_4__SAR86 clade; Ambiguous_taxa; Ambiguous_taxa                               |
|                    | OTU 54 | 1.474 | 25.88 | D_1__Bacteroidetes; D_2__Flavobacteriia; D_3__Flavobacteriales; D_4__Flavobacteriaceae; D_5__ <i>Formosa</i> ; Ambiguous_taxa                         |
|                    | OTU 23 | 1.391 | 27.27 | D_1__Proteobacteria; D_2__Betaproteobacteria; D_3__Methylophilales; D_4__Methylophilaceae; D_5__OM43 clade; D_6__uncultured bacterium                 |
|                    | OTU 55 | 1.365 | 28.63 | D_1__Bacteroidetes; D_2__Flavobacteriia; D_3__Flavobacteriales; D_4__Cryomorphaceae; D_5__uncultured; D_6__uncultured Bacteroidetes bacterium         |
|                    | OTU 56 | 1.344 | 29.98 | D_1__Proteobacteria; D_2__Gammaproteobacteria; D_3__Oceanospirillales; D_4__SAR86 clade; D_5__uncultured bacterium; D_6__uncultured bacterium         |
|                    | OTU 57 | 1.296 | 31.27 | D_1__Bacteroidetes; D_2__Flavobacteriia; D_3__Flavobacteriales; D_4__Cryomorphaceae; D_5__ <i>Fluviicola</i> ; D_6__uncultured bacterium              |
|                    | OTU 58 | 1.183 | 32.45 | D_1__Proteobacteria; D_2__Gammaproteobacteria; D_3__Cellvibrionales; D_4__Haliaceae; D_5__OM60(NOR5) clade; D_6__uncultured bacterium                 |
|                    | OTU 59 | 1.173 | 33.63 | D_1__Bacteroidetes; D_2__Flavobacteriia; D_3__Flavobacteriales; D_4__Flavobacteriaceae; D_5__NS5 marine group                                         |
|                    | OTU 39 | 1.035 | 34.66 | D_1__Proteobacteria; D_2__Alphaproteobacteria; D_3__SAR11 clade; D_4__Surface 1; Ambiguous_taxa; Ambiguous_taxa                                       |
|                    | OTU 60 | 0.949 | 35.61 | D_1__Firmicutes; D_2__Bacilli; D_3__Bacillales; D_4__Family XII; D_5__ <i>Exiguobacterium</i>                                                         |
|                    | OTU 48 | 0.908 | 36.52 | D_1__Proteobacteria; D_2__Alphaproteobacteria; D_3__SAR11 clade; D_4__Surface 1                                                                       |
|                    | OTU 61 | 0.867 | 37.39 | D_1__Proteobacteria; D_2__Alphaproteobacteria; D_3__Rhodobacterales; D_4__Rhodobacteraceae                                                            |
|                    | OTU 62 | 0.849 | 38.24 | D_1__Marinimicrobia (SAR406 clade); Ambiguous_taxa; Ambiguous_taxa; Ambiguous_taxa; Ambiguous_taxa; Ambiguous_taxa                                    |
|                    | OTU 63 | 0.838 | 39.07 | D_1__Bacteroidetes; D_2__Flavobacteriia; D_3__Flavobacteriales; D_4__Cryomorphaceae; D_5__ <i>Fluviicola</i> ; D_6__uncultured bacterium              |

key driver OTUs: top 20 OTUs most contributing to the compositional variation of bacterial communities.
