# Supplementary material for: Seasonality in Spatial Turnover of Bacterioplankton Along an Ecological Gradient in the East China Sea: Biogeographic Patterns, Processes and Drivers
Source: MDPI journal article supplement (doi:10.3390/microorganisms8101484), 2020-09-27
Supplement: s1 [file s1]

**Dataset S1** Geo-environmental variables of the sampling sites in this study.

| Sample ID | Longitude (E) | Latitude (N) | Season | Site | water temperature<br>(°C) | pH   | Salinity<br>(‰) | DO<br>(mg/L) | COD<br>(mg/L) | TOC<br>(mg/L) | DIN<br>(mg/L) | TP<br>(mg/L) | Phosphate-P<br>(mg/L) | Chl-a<br>(µg/L) |
|-----------|---------------|--------------|--------|------|---------------------------|------|-----------------|--------------|---------------|---------------|---------------|--------------|-----------------------|-----------------|
| 13091501  | 122.0186      | 29.3098      | Summer | A    | 25.0                      | 8.10 | 25.98           | 6.91         | 0.95          | 1.43          | 0.524         | 0.1543       | 0.0396                | 10.0            |
| 13091502  | 122.0186      | 29.3098      | Summer | A    | 25.0                      | 8.07 | 25.95           | 7.02         | 1.00          | 1.44          | 0.545         | 0.1524       | 0.0401                | 26.2            |
| 13091503  | 122.0186      | 29.3098      | Summer | A    | 25.1                      | 8.07 | 26.04           | 6.94         | 0.91          | 1.44          | 0.522         | 0.1321       | 0.0387                | 30.8            |
| 13091504  | 122.0186      | 29.3098      | Summer | A    | 25.1                      | 8.09 | 26.12           | 7.07         | 0.97          | 1.46          | 0.540         | 0.1493       | 0.0410                | 13.8            |
| 13091505  | 122.0186      | 29.3098      | Summer | A    | 25.1                      | 8.10 | 26.03           | 6.95         | 0.94          | 1.45          | 0.550         | 0.1501       | 0.0391                | 20.7            |
| 13091601  | 122.0610      | 29.3426      | Summer | B    | 25.1                      | 8.11 | 26.35           | 7.10         | 0.84          | 1.64          | 0.493         | 0.0824       | 0.0409                | 4.7             |
| 13091602  | 122.0610      | 29.3426      | Summer | B    | 25.0                      | 8.09 | 26.41           | 7.07         | 0.81          | 1.61          | 0.485         | 0.0742       | 0.0389                | 4.4             |
| 13091603  | 122.0610      | 29.3426      | Summer | B    | 25.1                      | 8.10 | 26.33           | 6.87         | 0.77          | 1.64          | 0.479         | 0.0731       | 0.0377                | 3.5             |
| 13091604  | 122.0610      | 29.3426      | Summer | B    | 25.2                      | 8.08 | 26.28           | 6.93         | 0.90          | 1.59          | 0.497         | 0.0882       | 0.0401                | 38.2            |
| 13091605  | 122.0610      | 29.3426      | Summer | B    | 25.2                      | 8.09 | 26.37           | 6.88         | 0.95          | 1.60          | 0.495         | 0.0784       | 0.0411                | 24.7            |
| 13091801  | 122.2241      | 29.3606      | Summer | C    | 24.9                      | 8.11 | 27.11           | 7.12         | 0.74          | 1.45          | 0.427         | 0.0656       | 0.0371                | 5.7             |
| 13091802  | 122.2241      | 29.3606      | Summer | C    | 24.9                      | 8.12 | 27.19           | 7.04         | 0.70          | 1.47          | 0.432         | 0.0658       | 0.0367                | 3.8             |
| 13091803  | 122.2241      | 29.3606      | Summer | C    | 24.9                      | 8.13 | 27.21           | 7.06         | 0.79          | 1.41          | 0.435         | 0.0623       | 0.0345                | 3.3             |
| 13091804  | 122.2241      | 29.3606      | Summer | C    | 25.0                      | 8.13 | 27.09           | 6.94         | 0.68          | 1.43          | 0.436         | 0.0622       | 0.0353                | 8.2             |
| 13091805  | 122.2241      | 29.3606      | Summer | C    | 25.0                      | 8.12 | 27.15           | 6.97         | 0.73          | 1.42          | 0.437         | 0.0636       | 0.0348                | 4.5             |
| 13092001  | 122.5095      | 29.3756      | Summer | D    | 24.8                      | 8.13 | 28.35           | 7.20         | 0.80          | 1.67          | 0.387         | 0.0504       | 0.0329                | 6.2             |
| 13092002  | 122.5095      | 29.3756      | Summer | D    | 24.7                      | 8.14 | 28.23           | 7.16         | 0.73          | 1.66          | 0.379         | 0.0483       | 0.0337                | 7.0             |
| 13092003  | 122.5095      | 29.3756      | Summer | D    | 24.8                      | 8.14 | 28.41           | 7.07         | 0.69          | 1.65          | 0.392         | 0.0499       | 0.0332                | 10.4            |
| 13092004  | 122.5095      | 29.3756      | Summer | D    | 24.8                      | 8.12 | 28.36           | 7.24         | 0.74          | 1.67          | 0.369         | 0.0482       | 0.0323                | 18.8            |
| 13092005  | 122.5095      | 29.3756      | Summer | D    | 24.7                      | 8.12 | 28.33           | 7.15         | 0.85          | 1.67          | 0.374         | 0.0512       | 0.0354                | 5.4             |
| 13092101  | 122.6709      | 29.3611      | Summer | E    | 24.7                      | 8.14 | 29.23           | 7.00         | 0.70          | 1.73          | 0.359         | 0.0358       | 0.0321                | 12.7            |
| 13092102  | 122.6709      | 29.3611      | Summer | E    | 24.7                      | 8.14 | 29.21           | 6.98         | 0.65          | 1.71          | 0.364         | 0.0348       | 0.0332                | 33.1            |
| 13092103  | 122.6709      | 29.3611      | Summer | E    | 24.7                      | 8.13 | 29.18           | 6.84         | 0.74          | 1.72          | 0.376         | 0.0355       | 0.0327                | 10.1            |
| 13101501  | 122.0168      | 29.3538      | Autumn | A    | 20.4                      | 8.05 | 25.91           | 8.31         | 0.65          | 1.59          | 0.564         | 0.1239       | 0.0389                | 5.8             |
| 13101502  | 122.0168      | 29.3538      | Autumn | A    | 20.5                      | 8.06 | 25.88           | 8.26         | 0.66          | 1.57          | 0.554         | 0.1462       | 0.0397                | 2.9             |
| 13101503  | 122.0168      | 29.3538      | Autumn | A    | 20.5                      | 8.05 | 25.81           | 8.09         | 0.63          | 1.58          | 0.550         | 0.1201       | 0.0412                | 5.9             |
| 13101504  | 122.0168      | 29.3538      | Autumn | A    | 20.4                      | 8.04 | 25.79           | 7.95         | 0.80          | 1.59          | 0.563         | 0.1467       | 0.0401                | 2.8             |
| 13101505  | 122.0168      | 29.3538      | Autumn | A    | 20.5                      | 8.05 | 25.77           | 7.97         | 0.76          | 1.58          | 0.568         | 0.1436       | 0.0397                | 6.1             |
| 13101601  | 122.0705      | 29.3238      | Autumn | B    | 20.6                      | 8.05 | 25.71           | 7.88         | 0.59          | 1.64          | 0.513         | 0.0586       | 0.0399                | 4.1             |
| 13101602  | 122.0705      | 29.3238      | Autumn | B    | 20.5                      | 8.06 | 25.73           | 7.96         | 0.68          | 1.62          | 0.528         | 0.0623       | 0.0389                | 3.7             |
| 13101603  | 122.0705      | 29.3238      | Autumn | B    | 20.6                      | 8.05 | 25.74           | 7.95         | 0.69          | 1.64          | 0.517         | 0.0712       | 0.0384                | 3.4             |
| 13101604  | 122.0705      | 29.3238      | Autumn | B    | 20.5                      | 8.06 | 25.73           | 7.85         | 0.84          | 1.63          | 0.514         | 0.0687       | 0.0392                | 4.5             |
| 13101605  | 122.0705      | 29.3238      | Autumn | B    | 20.6                      | 8.06 | 25.69           | 7.96         | 0.75          | 1.61          | 0.514         | 0.0647       | 0.0402                | 4.4             |
| 13101801  | 122.2258      | 29.3614      | Autumn | C    | 20.8                      | 8.09 | 26.43           | 7.89         | 0.79          | 1.45          | 0.458         | 0.0654       | 0.0385                | 2.2             |
| 13101802  | 122.2258      | 29.3614      | Autumn | C    | 20.8                      | 8.08 | 26.45           | 7.82         | 0.77          | 1.43          | 0.444         | 0.0657       | 0.0389                | 2.9             |

|          |          |         |        |   |      |      |       |       |      |      |       |        |        |     |
|----------|----------|---------|--------|---|------|------|-------|-------|------|------|-------|--------|--------|-----|
| 13101803 | 122.2258 | 29.3614 | Autumn | C | 20.7 | 8.10 | 26.43 | 7.94  | 0.69 | 1.42 | 0.448 | 0.0595 | 0.0366 | 5.6 |
| 13101804 | 122.2258 | 29.3614 | Autumn | C | 20.9 | 8.10 | 26.44 | 7.89  | 0.64 | 1.43 | 0.455 | 0.0616 | 0.0371 | 5.1 |
| 13101805 | 122.2258 | 29.3614 | Autumn | C | 20.7 | 8.09 | 26.45 | 7.72  | 0.67 | 1.41 | 0.437 | 0.0627 | 0.0359 | 5.1 |
| 13102001 | 122.5814 | 29.3686 | Autumn | D | 21.6 | 8.10 | 26.13 | 7.95  | 0.72 | 1.67 | 0.387 | 0.0412 | 0.0318 | 4.2 |
| 13102002 | 122.5814 | 29.3686 | Autumn | D | 21.5 | 8.11 | 26.11 | 7.72  | 0.63 | 1.66 | 0.378 | 0.0402 | 0.0323 | 4.4 |
| 13102003 | 122.5814 | 29.3686 | Autumn | D | 21.6 | 8.11 | 26.07 | 7.63  | 0.61 | 1.65 | 0.375 | 0.0416 | 0.0319 | 9.1 |
| 13102004 | 122.5814 | 29.3686 | Autumn | D | 21.5 | 8.10 | 26.11 | 7.83  | 0.67 | 1.66 | 0.383 | 0.0409 | 0.0322 | 8.4 |
| 13102005 | 122.5814 | 29.3686 | Autumn | D | 21.6 | 8.12 | 26.09 | 7.68  | 0.65 | 1.65 | 0.378 | 0.0432 | 0.0331 | 8.9 |
| 13102101 | 122.7043 | 29.3647 | Autumn | E | 21.8 | 8.11 | 25.33 | 7.60  | 0.85 | 1.69 | 0.338 | 0.0338 | 0.0286 | 2.2 |
| 13102102 | 122.7043 | 29.3647 | Autumn | E | 21.7 | 8.12 | 25.33 | 7.76  | 0.77 | 1.71 | 0.347 | 0.0348 | 0.0279 | 2.7 |
| 13102103 | 122.7043 | 29.3647 | Autumn | E | 21.8 | 8.11 | 25.32 | 7.71  | 0.71 | 1.72 | 0.333 | 0.0338 | 0.0295 | 1.2 |
| 13102104 | 122.7043 | 29.3647 | Autumn | E | 21.8 | 8.12 | 25.33 | 7.68  | 0.72 | 1.74 | 0.336 | 0.0351 | 0.0288 | 1.6 |
| 13102105 | 122.7043 | 29.3647 | Autumn | E | 21.9 | 8.12 | 25.32 | 7.76  | 0.66 | 1.75 | 0.338 | 0.0341 | 0.0269 | 1.3 |
| 14011501 | 121.9835 | 29.2705 | Winter | A | 10.1 | 8.10 | 26.08 | 9.89  | 0.85 | 1.67 | 0.738 | 0.0406 | 0.0376 | 1.2 |
| 14011502 | 121.9835 | 29.2705 | Winter | A | 10.0 | 8.11 | 26.77 | 9.92  | 0.83 | 1.68 | 0.722 | 0.0418 | 0.0373 | 0.7 |
| 14011503 | 121.9835 | 29.2705 | Winter | A | 10.1 | 8.10 | 26.84 | 10.15 | 0.80 | 1.66 | 0.722 | 0.0422 | 0.0370 | 0.8 |
| 14011504 | 121.9835 | 29.2705 | Winter | A | 10.0 | 8.11 | 26.64 | 9.94  | 0.78 | 1.63 | 0.697 | 0.0413 | 0.0370 | 0.8 |
| 14011505 | 121.9835 | 29.2705 | Winter | A | 10.0 | 8.11 | 26.85 | 9.86  | 0.77 | 1.62 | 0.695 | 0.0429 | 0.0367 | 1.1 |
| 14011601 | 122.0556 | 29.3259 | Winter | B | 10.2 | 8.11 | 26.72 | 9.97  | 0.81 | 1.76 | 0.630 | 0.0443 | 0.0373 | 0.8 |
| 14011602 | 122.0556 | 29.3259 | Winter | B | 10.2 | 8.11 | 27.11 | 10.29 | 0.77 | 1.73 | 0.634 | 0.0451 | 0.0391 | 0.7 |
| 14011603 | 122.0556 | 29.3259 | Winter | B | 10.1 | 8.11 | 27.21 | 9.73  | 0.75 | 1.73 | 0.580 | 0.0426 | 0.0385 | 0.6 |
| 14011604 | 122.0556 | 29.3259 | Winter | B | 10.2 | 8.12 | 27.07 | 10.32 | 0.71 | 1.71 | 0.597 | 0.0419 | 0.0367 | 0.8 |
| 14011605 | 122.0556 | 29.3259 | Winter | B | 10.2 | 8.12 | 27.13 | 10.08 | 0.85 | 1.69 | 0.609 | 0.0435 | 0.0388 | 0.6 |
| 14011801 | 122.2444 | 29.3648 | Winter | C | 10.9 | 8.14 | 27.94 | 9.93  | 0.76 | 1.53 | 0.530 | 0.0495 | 0.0351 | 1.2 |
| 14011802 | 122.2444 | 29.3648 | Winter | C | 11.0 | 8.15 | 27.98 | 9.74  | 0.64 | 1.51 | 0.530 | 0.0485 | 0.0348 | 0.8 |
| 14011803 | 122.2444 | 29.3648 | Winter | C | 11.0 | 8.15 | 28.12 | 10.27 | 0.83 | 1.49 | 0.472 | 0.0488 | 0.0351 | 0.7 |
| 14011804 | 122.2444 | 29.3648 | Winter | C | 11.0 | 8.15 | 28.15 | 10.09 | 0.68 | 1.48 | 0.466 | 0.0467 | 0.0333 | 1.0 |
| 14011805 | 122.2444 | 29.3648 | Winter | C | 10.9 | 8.15 | 28.18 | 9.54  | 0.77 | 1.46 | 0.512 | 0.0473 | 0.0339 | 1.3 |
| 14012001 | 122.5521 | 29.3681 | Winter | D | 11.8 | 8.19 | 29.97 | 9.12  | 0.45 | 1.49 | 0.325 | 0.0305 | 0.0237 | 1.6 |
| 14012002 | 122.5521 | 29.3681 | Winter | D | 11.9 | 8.20 | 30.05 | 8.97  | 0.54 | 1.47 | 0.310 | 0.0319 | 0.0246 | 1.2 |
| 14012003 | 122.5521 | 29.3681 | Winter | D | 11.8 | 8.20 | 30.16 | 10.00 | 0.52 | 1.45 | 0.338 | 0.0333 | 0.0246 | 1.5 |
| 14012004 | 122.5521 | 29.3681 | Winter | D | 11.8 | 8.19 | 30.06 | 9.53  | 0.54 | 1.39 | 0.328 | 0.0321 | 0.0225 | 1.3 |
| 14012005 | 122.5521 | 29.3681 | Winter | D | 11.9 | 8.19 | 30.09 | 9.48  | 0.45 | 1.41 | 0.322 | 0.0316 | 0.0225 | 1.1 |
| 14012101 | 122.6855 | 29.3571 | Winter | E | 12.4 | 8.19 | 31.39 | 9.83  | 0.53 | 1.39 | 0.275 | 0.0221 | 0.0169 | 0.8 |
| 14012102 | 122.6855 | 29.3571 | Winter | E | 12.5 | 8.19 | 31.52 | 9.16  | 0.46 | 1.37 | 0.260 | 0.0226 | 0.0169 | 0.6 |
| 14012103 | 122.6855 | 29.3571 | Winter | E | 12.5 | 8.20 | 31.53 | 9.41  | 0.51 | 1.38 | 0.224 | 0.0228 | 0.0166 | 1.2 |
| 14012104 | 122.6855 | 29.3571 | Winter | E | 12.5 | 8.20 | 31.67 | 9.35  | 0.52 | 1.37 | 0.240 | 0.0223 | 0.0184 | 0.6 |
| 14012105 | 122.6855 | 29.3571 | Winter | E | 12.5 | 8.19 | 31.57 | 9.02  | 0.53 | 1.35 | 0.216 | 0.0215 | 0.0191 | 1.5 |
| 14051501 | 122.0173 | 29.3701 | Spring | A | 20.8 | 8.10 | 27.44 | 8.05  | 0.97 | 1.61 | 0.644 | 0.0702 | 0.0263 | 9.4 |

|          |          |         |        |   |      |      |       |      |      |      |       |        |        |      |
|----------|----------|---------|--------|---|------|------|-------|------|------|------|-------|--------|--------|------|
| 14051502 | 122.0173 | 29.3701 | Spring | A | 20.8 | 8.10 | 27.61 | 7.96 | 0.87 | 1.63 | 0.622 | 0.0691 | 0.0257 | 11.3 |
| 14051503 | 122.0173 | 29.3701 | Spring | A | 20.9 | 8.09 | 27.95 | 7.97 | 1.05 | 1.61 | 0.617 | 0.0648 | 0.0239 | 8.6  |
| 14051504 | 122.0173 | 29.3701 | Spring | A | 20.8 | 8.09 | 27.91 | 7.97 | 1.01 | 1.58 | 0.649 | 0.0712 | 0.0251 | 8.5  |
| 14051505 | 122.0173 | 29.3701 | Spring | A | 20.9 | 8.10 | 27.81 | 8.02 | 0.75 | 1.57 | 0.632 | 0.0566 | 0.0259 | 9.2  |
| 14051601 | 122.0687 | 29.3701 | Spring | B | 20.9 | 8.12 | 27.94 | 8.05 | 0.68 | 1.55 | 0.519 | 0.0536 | 0.0233 | 6.5  |
| 14051602 | 122.0687 | 29.3701 | Spring | B | 20.8 | 8.11 | 28.29 | 7.96 | 0.83 | 1.62 | 0.516 | 0.0499 | 0.0241 | 6.9  |
| 14051603 | 122.0687 | 29.3701 | Spring | B | 20.9 | 8.13 | 28.22 | 6.48 | 0.91 | 1.62 | 0.527 | 0.0497 | 0.0231 | 4.5  |
| 14051604 | 122.0687 | 29.3701 | Spring | B | 20.9 | 8.11 | 28.15 | 7.95 | 1.12 | 1.55 | 0.517 | 0.0512 | 0.0251 | 7.7  |
| 14051605 | 122.0687 | 29.3701 | Spring | B | 20.9 | 8.12 | 28.16 | 7.94 | 0.73 | 1.62 | 0.518 | 0.0501 | 0.0239 | 7.1  |
| 14051801 | 122.2669 | 29.3670 | Spring | C | 21.1 | 8.12 | 28.53 | 7.74 | 0.76 | 1.57 | 0.536 | 0.0494 | 0.0225 | 4.2  |
| 14051802 | 122.2669 | 29.3670 | Spring | C | 21.2 | 8.13 | 28.71 | 7.88 | 0.72 | 1.59 | 0.540 | 0.0497 | 0.0228 | 4.8  |
| 14051803 | 122.2669 | 29.3670 | Spring | C | 21.1 | 8.12 | 28.74 | 7.84 | 0.82 | 1.56 | 0.540 | 0.0501 | 0.0231 | 7.3  |
| 14051804 | 122.2669 | 29.3670 | Spring | C | 21.1 | 8.11 | 28.89 | 7.76 | 0.79 | 1.62 | 0.539 | 0.0534 | 0.0231 | 13.2 |
| 14051805 | 122.2669 | 29.3670 | Spring | C | 21.2 | 8.12 | 28.65 | 7.88 | 0.72 | 1.55 | 0.546 | 0.0552 | 0.0223 | 7.7  |
| 14052101 | 122.6501 | 29.3834 | Spring | E | 21.0 | 8.52 | 30.75 | 8.87 | 1.62 | 1.63 | 0.111 | 0.0121 | 0.0041 | 7.8  |
| 14052102 | 122.6501 | 29.3834 | Spring | E | 21.0 | 8.49 | 30.75 | 8.79 | 1.56 | 1.66 | 0.107 | 0.0116 | 0.0036 | 7.5  |
| 14052103 | 122.6501 | 29.3834 | Spring | E | 21.0 | 8.51 | 30.76 | 8.75 | 1.59 | 1.61 | 0.109 | 0.0127 | 0.0037 | 7.6  |
| 14052104 | 122.6501 | 29.3834 | Spring | E | 21.0 | 8.53 | 30.76 | 8.87 | 1.60 | 1.65 | 0.111 | 0.0126 | 0.0038 | 7.6  |
| 14052105 | 122.6501 | 29.3834 | Spring | E | 21.0 | 8.50 | 30.75 | 8.80 | 1.56 | 1.64 | 0.111 | 0.0122 | 0.0037 | 7.7  |

DO: dissolved oxygen, COD: chemical oxygen demand, TOC: total organic carbon, TP: total phosphorus, DIN: dissolved inorganic nitrogen, Chl-a: chlorophyll a.
